# Supplementary material for: Influence of irrigation on root zone storage capacity estimation
Source: Copernicus journal article supplement (doi:10.5194/egusphere-2023-2622), 2023-11-21
Supplement: Supplementary file 1 [file egusphere-2023-2622-supplement.pdf]

## Supplement

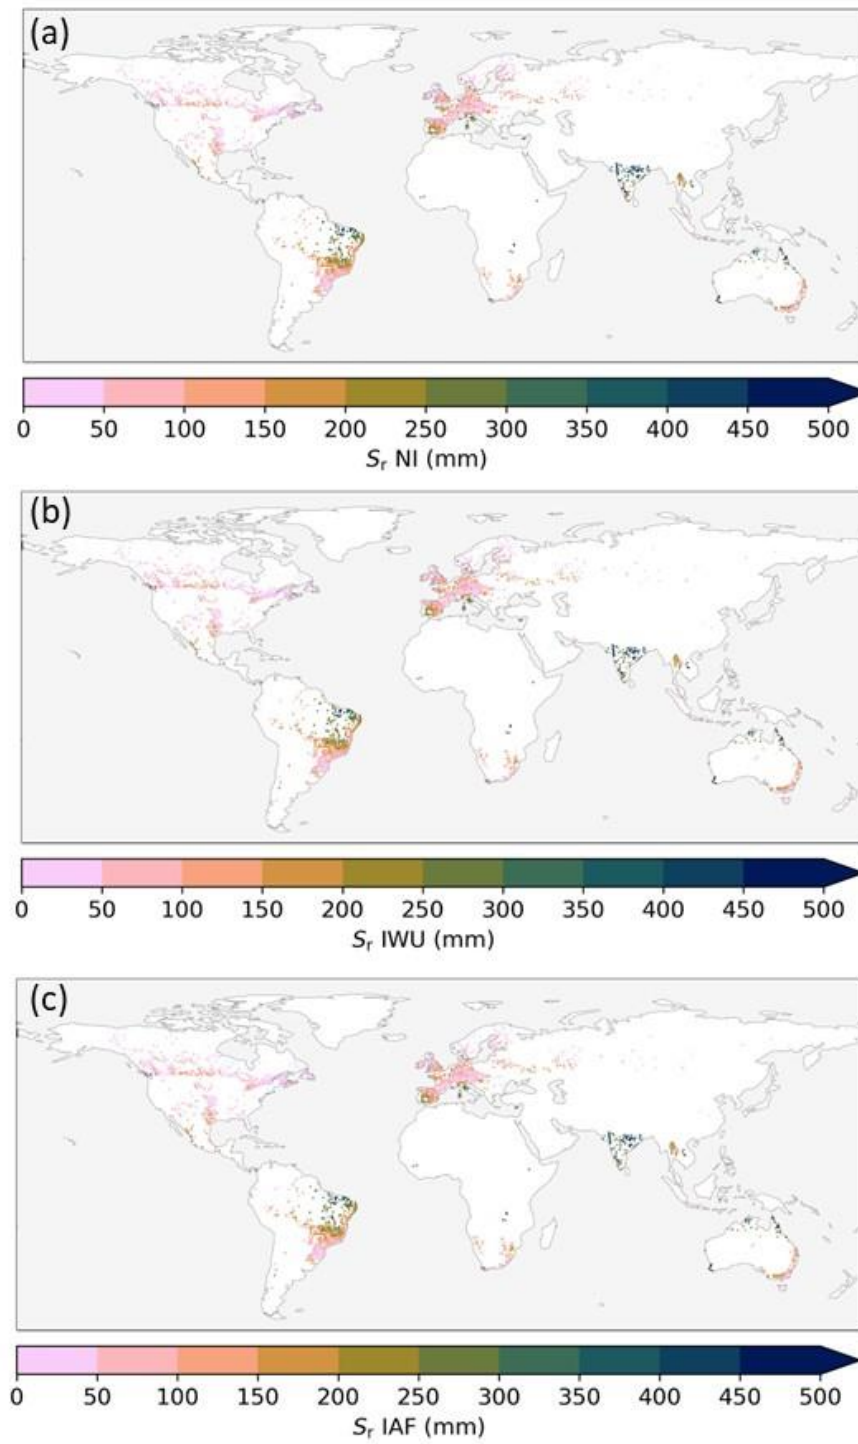

Figure S 1. Catchment  $S_r$  in mm for (a) the No Irrigation (NI) case, (b) the IWU irrigation case, and (c) the IAF irrigation case (Table 1), with dots representing catchment outlets.

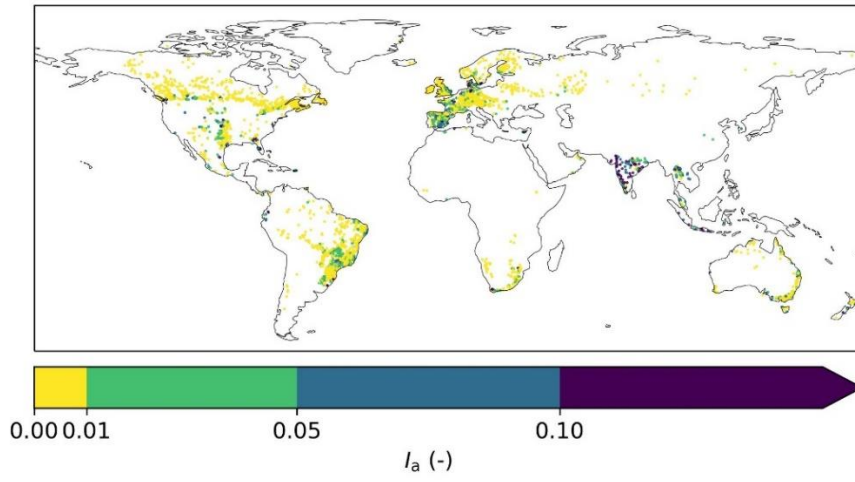

Figure S 2 Irrigated area fraction ( $I_a$ ) stratified in the four groups used in Fig. 7 with dots representing the catchment outlets (Siebert et al., 2015)

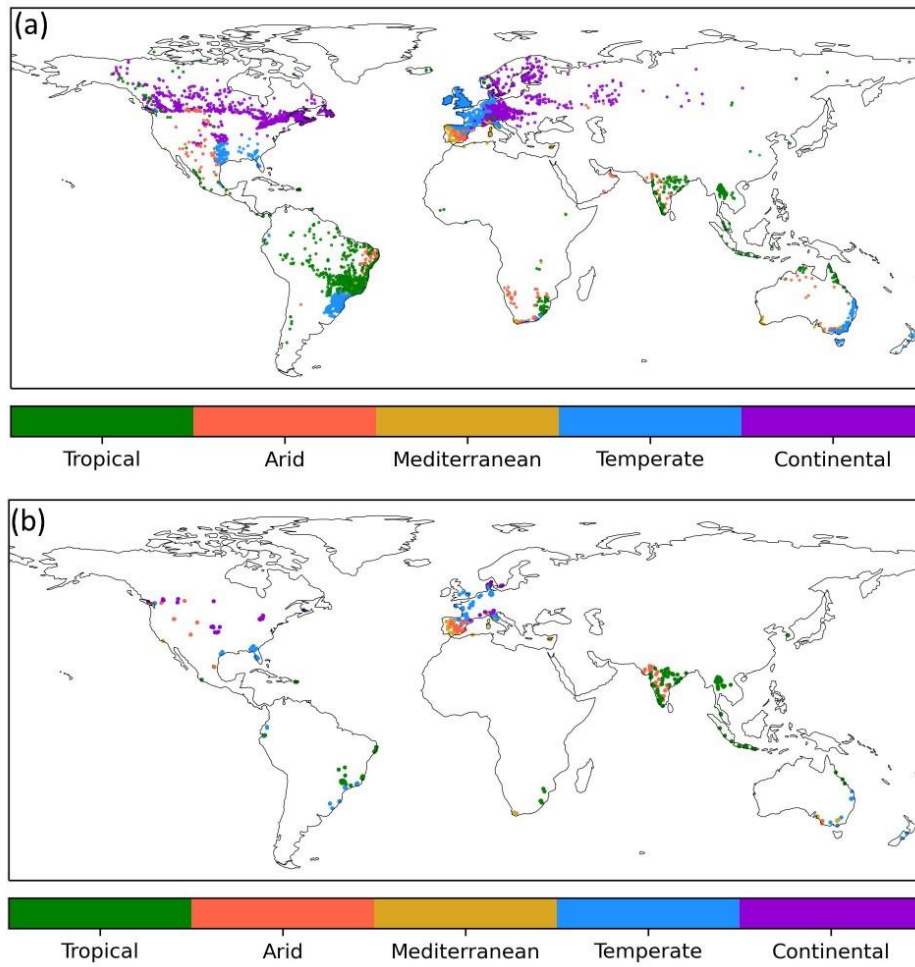

Figure S 3. Climate zone stratification used in Fig. 8b. (a) shows all study catchments and (b) catchments with  $I_{\alpha} > 0.05$ . The following classification based on Koppen-Geiger is used: tropical (Af, Am, Aw), arid (BWh, BWk, BSh, BSk), temperate dry summer (Cfa, Cfb, Cfc), Mediterranean (Csa, CSb), and continental (Dfa, Dfb, Dfc, Dfd) (Beck et al., 2018).
